# Supplementary material for: Increased Salt Intake Decreases Diet-Induced Thermogenesis in Healthy Volunteers: A Randomized Placebo-Controlled Study
Source: MDPI journal article supplement (doi:10.3390/nu14020253), 2022-01-07
Supplement: s1 [file s1]

**Supplementary Table S1.** Individual daily values of urine volume and sodium excretion in the placebo group before and after the intervention.

| Placebo, before       |       | M1   | M2   | M3   | M4   | M5   | M6   | M7   | M8   | M9   | W1   | W2   | W3   | W4   | W5   | W6   | W7   | W8   | W9   | W10  |
|-----------------------|-------|------|------|------|------|------|------|------|------|------|------|------|------|------|------|------|------|------|------|------|
| Urine volume (mL)     | d1    | 1800 | 2100 | 1000 | ND   | 1400 | 1820 | 1000 | 3700 | 2480 | 3000 | 4660 | 2400 | 2400 | 2600 | 2800 | 580  | 2270 | 1100 | 1600 |
|                       | d2    | 2100 | 1500 | 700  | 2700 | 2000 | 1850 | 1600 | 2150 | 1620 | 3650 | 4400 | 1500 | 1720 | 1500 | 2600 | 2480 | 2000 | 1720 | 2800 |
|                       | d3    | 2700 | 1550 | 2780 | 3450 | 1530 | 1800 | 900  | 3200 | 2050 | 5400 | 2500 | 2250 | 1500 | 1680 | 2100 | 1800 | 1500 | 2770 | 2520 |
|                       | d 1-3 | 2200 | 1717 | 1493 | 3075 | 1643 | 1823 | 1167 | 3017 | 2050 | 4017 | 3853 | 2050 | 1873 | 1927 | 2500 | 1620 | 1923 | 1863 | 2307 |
|                       |       |      |      |      |      |      |      |      |      |      |      |      |      |      |      |      |      |      |      |      |
| Urine sodium (mmol/L) | d1    | 133  | 83   | 181  | ND   | 83   | 142  | 80   | 71   | 71   | 36   | 44   | 47   | 55   | 28   | 52   | 81   | 121  | 96   | 118  |
|                       | d2    | 130  | 96   | 164  | 34   | 116  | 107  | 113  | 88   | 104  | 64   | 32   | 51   | 44   | ND   | 44   | 88   | 122  | 66   | 76   |
|                       | d3    | 73   | 115  | 72   | 48   | 68   | 42   | 67   | 71   | 92   | 31   | 29   | 45   | 34   | 47   | 55   | 46   | 92   | 73   | 59   |
|                       | d 1-3 | 112  | 98   | 139  | 41   | 89   | 97   | 87   | 77   | 89   | 44   | 35   | 48   | 44   | 38   | 50   | 72   | 112  | 78   | 84   |
|                       |       |      |      |      |      |      |      |      |      |      |      |      |      |      |      |      |      |      |      |      |
| UNaV (g/d)            | d1    | 5,5  | 4,0  | 4,2  | ND   | 2,7  | 5,9  | 1,8  | 6,0  | 4,0  | 2,5  | 4,7  | 2,6  | 3,0  | 1,7  | 3,3  | 1,1  | 6,3  | 2,4  | 4,3  |
|                       | d2    | 6,3  | 3,3  | 2,6  | 2,1  | 5,3  | 4,6  | 4,2  | 4,3  | 3,9  | 5,4  | 3,2  | 1,8  | 1,7  | ND   | 2,6  | 5,0  | 5,6  | 2,6  | 4,9  |
|                       | d3    | 4,5  | 4,1  | 4,6  | 3,8  | 2,4  | 1,7  | 1,4  | 5,2  | 4,3  | 3,8  | 1,7  | 2,3  | 1,2  | 1,8  | 2,7  | 1,9  | 3,2  | 4,6  | 3,4  |
|                       | d 1-3 | 5,4  | 3,8  | 3,8  | 3,0  | 3,5  | 4,1  | 2,5  | 5,2  | 4,1  | 3,9  | 3,2  | 2,2  | 2,0  | 1,7  | 2,9  | 2,7  | 5,0  | 3,2  | 4,2  |
|                       |       |      |      |      |      |      |      |      |      |      |      |      |      |      |      |      |      |      |      |      |
| Placebo, after        |       | M1   | M2   | M3   | M4   | M5   | M6   | M7   | M8   | M9   | W1   | W2   | W3   | W4   | W5   | W6   | W7   | W8   | W9   | W10  |
| Urine volume (mL)     | d1    | 1350 | 1960 | 1630 | 2150 | 1100 | 2400 | 1520 | 2700 | 2900 | 4500 | 4500 | 1980 | 2100 | 2000 | 3100 | 2550 | 900  | 1280 | 3350 |
|                       | d2    | 1630 | 1400 | 2250 | 3200 | 1350 | 1340 | 1980 | 2100 | 1850 | 2650 | 4300 | 2200 | 1280 | 2280 | 3400 | 2420 | 1400 | 650  | 1400 |
|                       | d3    | 2210 | 1000 | 2700 | 2550 | 1980 | 1600 | 2250 | 1600 | 1200 | 3900 | 2600 | 2700 | 1900 | 2580 | 2800 | 2600 | 1400 | 860  | 800  |
|                       | d 1-3 | 1730 | 1453 | 2193 | 2633 | 1477 | 1780 | 1917 | 2133 | 1983 | 3683 | 3800 | 2293 | 1760 | 2287 | 3100 | 2523 | 1233 | 930  | 1850 |
|                       |       |      |      |      |      |      |      |      |      |      |      |      |      |      |      |      |      |      |      |      |
| Urine sodium (mmol/L) | d1    | 119  | 106  | 49   | 94   | 115  | 141  | 87   | 68   | 87   | 61   | 23   | 78   | 54   | 25   | 25   | 67   | 130  | 49   | 150  |
|                       | d2    | 199  | 66   | 114  | 122  | 66   | 159  | 107  | 115  | 137  | 42   | 34   | 67   | 163  | 67   | 103  | 55   | 135  | 97   | 103  |
|                       | d3    | 149  | 79   | 136  | 100  | 76   | 107  | 96   | 86   | 167  | 32   | 20   | 51   | 104  | 71   | 85   | 65   | 117  | 71   | 111  |
|                       | d 1-3 | 156  | 84   | 100  | 111  | 86   | 136  | 97   | 90   | 130  | 45   | 26   | 65   | 107  | 48   | 54   | 62   | 127  | 72   | 121  |
|                       |       |      |      |      |      |      |      |      |      |      |      |      |      |      |      |      |      |      |      |      |
| UNaV (g/d)            | d1    | 3,7  | 4,8  | 1,8  | 4,7  | 2,9  | 7,8  | 3,0  | 4,2  | 5,8  | 6,3  | 2,4  | 3,6  | 2,6  | 1,1  | 1,8  | 3,9  | 2,7  | 1,4  | 11,6 |
|                       | d2    | 7,5  | 2,1  | 5,9  | 9,0  | 2,0  | 4,9  | 4,9  | 5,6  | 5,8  | 2,6  | 3,4  | 3,4  | 4,8  | 3,5  | 8,1  | 3,1  | 4,3  | 1,4  | 3,3  |
|                       | d3    | 7,6  | 1,8  | 8,4  | 5,9  | 3,5  | 3,9  | 5,0  | 3,2  | 4,6  | 2,9  | 1,2  | 3,2  | 4,5  | 4,2  | 5,5  | 3,9  | 3,8  | 1,4  | 2,0  |
|                       | d 1-3 | 6,2  | 2,9  | 5,4  | 7,4  | 2,8  | 5,5  | 4,3  | 4,3  | 5,4  | 3,9  | 2,3  | 3,4  | 4,0  | 3,0  | 5,1  | 3,6  | 3,6  | 1,4  | 5,6  |

D, day; M, man; ND, not determined; W, woman

**Supplementary Table S2.** Individual daily values of urine volume and sodium excretion in the salt group before and after the intervention.

| Salt, before          |       | M10  | M11  | M12  | M13  | M14  | M15  | M16  | M17  | M18  | M19  | W11  | W12  | W13  | W14  | W15  | W16  | W17  | W18  | W19  |
|-----------------------|-------|------|------|------|------|------|------|------|------|------|------|------|------|------|------|------|------|------|------|------|
| Urine volume (mL)     | d1    | 300  | 2100 | 1200 | 1400 | 3200 | 2620 | 1500 | 2020 | 1280 | 900  | 700  | 2500 | 740  | 2000 | 1650 | 2100 | 1200 | 1050 | 2900 |
|                       | d2    | 200  | 820  | 2250 | 1800 | 3200 | 3050 | 2400 | 1320 | 1100 | 800  | 1850 | 3500 | 1430 | 2200 | 2000 | 2600 | 1580 | 1300 | 2930 |
|                       | d3    | 980  | 1200 | 1980 | 2300 | 4000 | 2180 | 850  | 2100 | 1000 | 800  | 1200 | 1800 | 1410 | 2800 | 2100 | 2000 | 1200 | 700  | 1800 |
|                       | d 1-3 | 493  | 1373 | 1810 | 1833 | 3467 | 2617 | 1583 | 1813 | 1127 | 833  | 1250 | 2600 | 1193 | 2333 | 1917 | 2233 | 1327 | 1017 | 2543 |
|                       |       |      |      |      |      |      |      |      |      |      |      |      |      |      |      |      |      |      |      |      |
| Urine sodium (mmol/L) | d1    | 80   | 46   | 196  | 83   | 57   | 42   | 149  | 90   | 117  | 159  | 80   | 52   | 122  | 37   | 77   | 62   | 43   | 114  | 34   |
|                       | d2    | 83   | 117  | 116  | 87   | 43   | 38   | 99   | 170  | 157  | 143  | 63   | 57   | 131  | 39   | 71   | 80   | 50   | 131  | 28   |
|                       | d3    | 50   | 124  | 94   | 76   | 65   | 73   | 119  | 140  | 200  | 152  | 77   | 67   | 75   | 56   | 67   | 64   | 64   | 210  | 39   |
|                       | d 1-3 | 71   | 96   | 135  | 82   | 55   | 51   | 122  | 133  | 158  | 151  | 73   | 59   | 109  | 44   | 72   | 69   | 52   | 152  | 34   |
|                       |       |      |      |      |      |      |      |      |      |      |      |      |      |      |      |      |      |      |      |      |
| UNaV (g/d)            | d1    | 0,6  | 2,2  | 5,4  | 2,7  | 4,2  | 2,5  | 5,1  | 4,2  | 3,4  | 3,3  | 1,3  | 3,0  | 2,1  | 1,7  | 2,9  | 3,0  | 1,2  | 2,8  | 2,3  |
|                       | d2    | 0,4  | 2,2  | 6,0  | 3,6  | 3,2  | 2,7  | 5,5  | 5,2  | 4,0  | 2,6  | 2,7  | 4,6  | 4,3  | 2,0  | 3,3  | 4,8  | 1,8  | 3,9  | 1,9  |
|                       | d3    | 1,1  | 3,4  | 4,3  | 4,0  | 6,0  | 3,7  | 2,3  | 6,8  | 4,6  | 2,8  | 2,1  | 2,8  | 2,4  | 3,6  | 3,2  | 2,9  | 1,8  | 3,4  | 1,6  |
|                       | d 1-3 | 0,7  | 2,6  | 5,2  | 3,4  | 4,4  | 3,0  | 4,3  | 5,4  | 4,0  | 2,9  | 2,0  | 3,4  | 2,9  | 2,4  | 3,1  | 3,6  | 1,6  | 3,3  | 1,9  |
|                       |       |      |      |      |      |      |      |      |      |      |      |      |      |      |      |      |      |      |      |      |
| Salt, after           |       | M10  | M11  | M12  | M13  | M14  | M15  | M16  | M17  | M18  | M19  | W11  | W12  | W13  | W14  | W15  | W16  | W17  | W18  | W19  |
| Urine volume (mL)     | d1    | 1100 | 1340 | 2200 | 1900 | 3800 | 3080 | 1620 | 1200 | 1500 | 710  | 1880 | 2700 | 1800 | ND   | 2880 | 1410 | 2150 | 1280 | 2050 |
|                       | d2    | 1720 | 1000 | 1700 | 2100 | 3700 | 3060 | 1700 | 1460 | 1700 | 1350 | 1250 | 3700 | 2500 | 3200 | 2500 | 2500 | 2100 | 1240 | 4100 |
|                       | d3    | 900  | 1480 | 1000 | 3000 | 2600 | 2080 | 1900 | 1980 | 1400 | 1010 | 2200 | 2100 | 2400 | 3600 | 2680 | 1690 | 1400 | 1120 | 1000 |
|                       | d 1-3 | 1240 | 1273 | 1633 | 2333 | 3367 | 2740 | 1740 | 1547 | 1533 | 1023 | 1777 | 2833 | 2233 | 3400 | 2687 | 1867 | 1883 | 1213 | 2383 |
|                       |       |      |      |      |      |      |      |      |      |      |      |      |      |      |      |      |      |      |      |      |
| Urine sodium (mmol/L) | d1    | 164  | 268  | 144  | 142  | 76   | 83   | 231  | 105  | 240  | 99   | 127  | 102  | 131  | ND   | 94   | 108  | 114  | 232  | 71   |
|                       | d2    | 127  | 276  | 139  | 94   | 48   | 62   | 185  | 189  | 242  | 175  | 100  | 86   | 138  | 86   | 98   | 130  | 98   | 207  | 79   |
|                       | d3    | 174  | 208  | 111  | 109  | 73   | 89   | 173  | 122  | 238  | 252  | 147  | 100  | 132  | 50   | 96   | 106  | 108  | 197  | 106  |
|                       | d 1-3 | 155  | 251  | 131  | 115  | 66   | 78   | 196  | 139  | 240  | 175  | 125  | 96   | 134  | 68   | 96   | 115  | 107  | 212  | 85   |
|                       |       |      |      |      |      |      |      |      |      |      |      |      |      |      |      |      |      |      |      |      |
| UNaV (g/d)            | d1    | 4,1  | 8,3  | 7,3  | 6,2  | 6,6  | 5,9  | 8,6  | 2,9  | 8,3  | 1,6  | 5,5  | 6,3  | 5,4  | ND   | 6,2  | 3,5  | 5,6  | 6,8  | 3,3  |
|                       | d2    | 5,0  | 6,3  | 5,4  | 4,5  | 4,1  | 4,4  | 7,2  | 6,3  | 9,5  | 5,4  | 2,9  | 7,3  | 7,9  | 6,3  | 5,6  | 7,5  | 4,7  | 5,9  | 7,4  |
|                       | d3    | 3,6  | 7,1  | 2,6  | 7,5  | 4,4  | 4,3  | 7,6  | 5,6  | 7,7  | 5,9  | 7,4  | 4,8  | 7,3  | 4,1  | 5,9  | 4,1  | 3,5  | 5,1  | 2,4  |
|                       | d 1-3 | 4,3  | 7,2  | 5,1  | 6,1  | 5,0  | 4,8  | 7,8  | 4,9  | 8,5  | 4,3  | 5,3  | 6,2  | 6,9  | 5,2  | 5,9  | 5,0  | 4,6  | 5,9  | 4,4  |

D, day; M, man; W, woman
